# Supplementary material
Source: Springer Nature journal article supplement (https://www.springermedizin.de/resource/supplementary/12889_2011_3817_MOESM3_ESM.pdf/9489880)

**Figure 1. Flow of the Study Design**

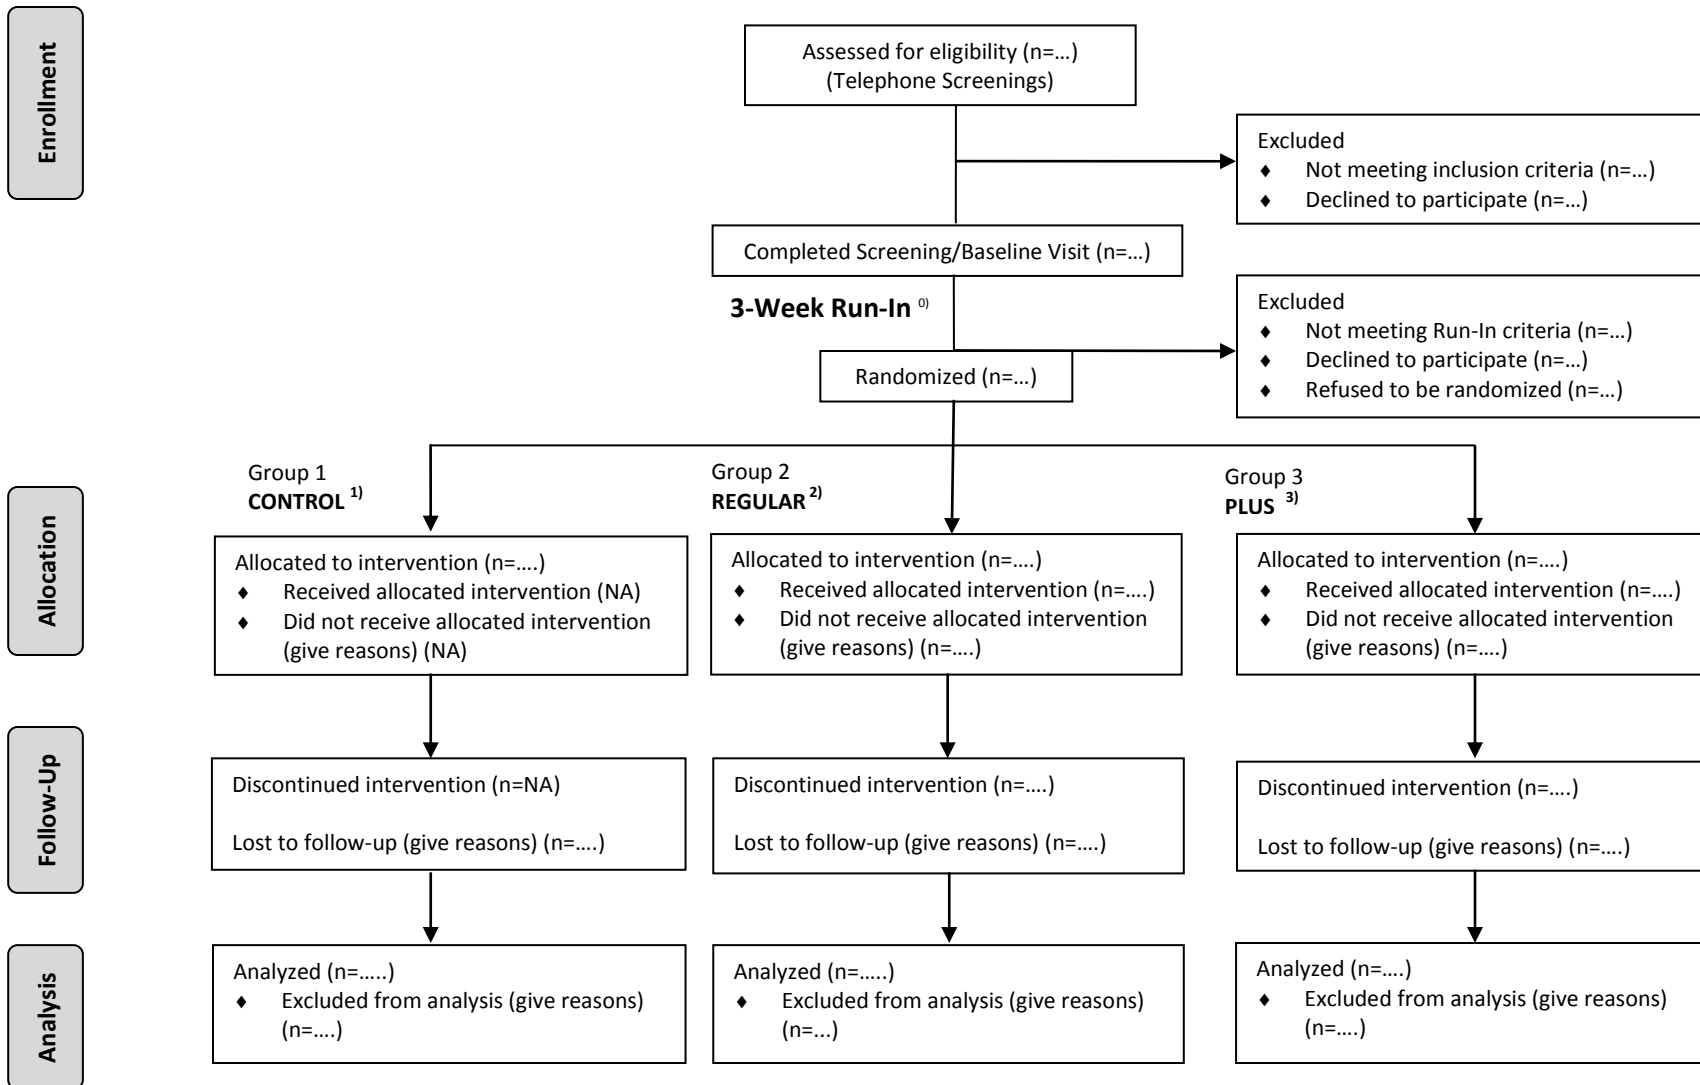

Supplement: MOESM3 [file 9489880]
